# Supplementary material for: Circulating CD40 and sCD40L Predict Changes in Renal Function in Subjects with Chronic Kidney Disease
Source: PubMed Central journal article supplement (PMC5554219; doi:10.1038/s41598-017-08426-8), 2017-08-11
Supplement: 41598_2017_8426_MOESM1_ESM.pdf [file 41598_2017_8426_MOESM1_ESM.pdf]

## **Circulating CD40 and sCD40L Predict Changes in Renal Function in Subjects with Chronic Kidney Disease**

Jeffrey X. Xie, BS<sup>1</sup>, Helen Alderson, MD<sup>2</sup>, James Ritchie, MD<sup>2</sup> Philip A. Kalra, MD<sup>2</sup>, Yanmei Xie, MA<sup>1</sup>, Kaili Ren, Ph.D<sup>1</sup>, Hanh Nguyen, MA<sup>1</sup>, Tian Chen, Ph.D<sup>1</sup>, Pamela Brewster, MA<sup>1</sup>, Rajesh Gupta, MD,<sup>1</sup> Lance D. Dworkin, MD<sup>1</sup>, Deepak Malhotra, MD, Ph.D.<sup>1</sup>, Christopher J. Cooper, MD<sup>1</sup>, Jiang Tian, Ph.D. <sup>1</sup> Steven T. Haller\*, Ph.D.<sup>1</sup>

<sup>1</sup>University of Toledo College of Medicine and Life Sciences, Toledo, Ohio

<sup>2</sup>Salford Royal Hospital, Salford, United Kingdom

**Running Title:** CD40 and Chronic Kidney Disease

**Key Words:** chronic kidney disease, CD40

**\*Address for Correspondence:**

Steven T. Haller, Ph.D.

University of Toledo College of Medicine and Life Sciences

Department of Medicine

Health Education Building RM205

3000 Arlington Ave.

Toledo, OH 43614

Phone: 419-383-6859

Fax: 419-383-6863

Steven.haller@utoledo.edu

## **Supplemental Information**

**S Table 1. Median sCD40L and sCD40R by Type of Primary Renal Disease**

| Primary renal disease*       | sCD40L<br>(p-value = 0.11)*** | sCD40R<br>(p-value = 0.77)*** | sCD40L**<br>(p-value = 0.11)*** | sCD40R**<br>(p-value = 0.77)*** |
|------------------------------|-------------------------------|-------------------------------|---------------------------------|---------------------------------|
| <b>DM</b> (n=40)             | 213.81 ± 188.02               | 72.63 ± 282.99                | 5.37 ± 0.79                     | 4.28 ± 1.96                     |
| <b>APKD</b> (n=16)           | 144.68 ± 137                  | 97.33 ± 292.68                | 4.97 ± 0.82                     | 4.58 ± 1.90                     |
| <b>GN/VAS</b> (n=83)         | 202.71 ± 18.48                | 78.15 ± 101.46                | 5.31 ± 0.84                     | 4.36 ± 1.09                     |
| <b>Pyelonephritis</b> (n=32) | 184.93 ± 203.44               | 87.68 ± 331.312               | 5.22 ± 1.01                     | 4.47 ± 1.97                     |
| <b>VAS/HTN</b> (n=16)        | 296.46 ± 172.81               | 125.30 ± 222.41               | 5.69 ± 0.58                     | 4.83 ± 1.44                     |
| <b>Other</b> (n=56)          | 204.27 ± 169.39               | 84.93 ± 255.83                | 5.32 ± 0.76                     | 4.44 ± 1.76                     |

\*Data are expressed as medians ± interquartile range (IQR)

\*\*sCD40L and sCD40R are measured in the log scale

\*\*\*Comparisons among renal disease types using nonparametric Kruskal-Wallis rank sum test

**Abbreviations:** sCD40L, soluble CD40 ligand; sCD40R, soluble CD40 receptor; DM, diabetic glomerularnephritis; APKD, adult polycystic kidney disease; GN/VAS, glomerularnephritis vasculitis; VAS/HTN, and vascular hypertension

**S Table 2. Independent Predictors of Percent Change in CKD-EPI eGFR at 1-Year Follow-up**

| Predictors** | Effect estimate (% change in eGFR)<br>(95% CI) | Odds Ratio* (95% CI) | P-value |
|--------------|------------------------------------------------|----------------------|---------|
| High sCD40L  | -7.95 (-14.43, -1.5)                           | 1.87 (1.12, 3.10)    | 0.016   |
| Low sCD40R   | -6.72 (-13.37, -0.063)                         | 1.70 (1.0, 2.85)     | 0.048   |
| Systolic BP  | -0.20 (-0.37, -0.025)                          | 1.02 (1.00, 1.03)    | 0.025   |

\*Odds ratio for a negative percent change in CKD-EPI eGFR at 1-year follow-up

\*\*Model was adjusted by age, sex, baseline CKD-EPI eGFR, peripheral vascular disease, systolic blood pressure, diabetes mellitus, baseline angiotensin converting enzyme inhibitor (ACEi) / angiotensin receptor blocker (ARB) or aspirin use, and primary renal disease. Only significant predictors are shown.

**Abbreviations:** CI, confidence interval; CKD-EPI, Chronic Kidney Disease Epidemiology Collaboration; eGFR, estimated glomerular filtration rate; BP, blood pressure; sCD40L, soluble CD40 ligand; sCD40R, soluble CD40 receptor

S Figure 1. Percent incidence and odds ratios of major adverse events for CRISIS participants grouped by sCD40L and sCD40R

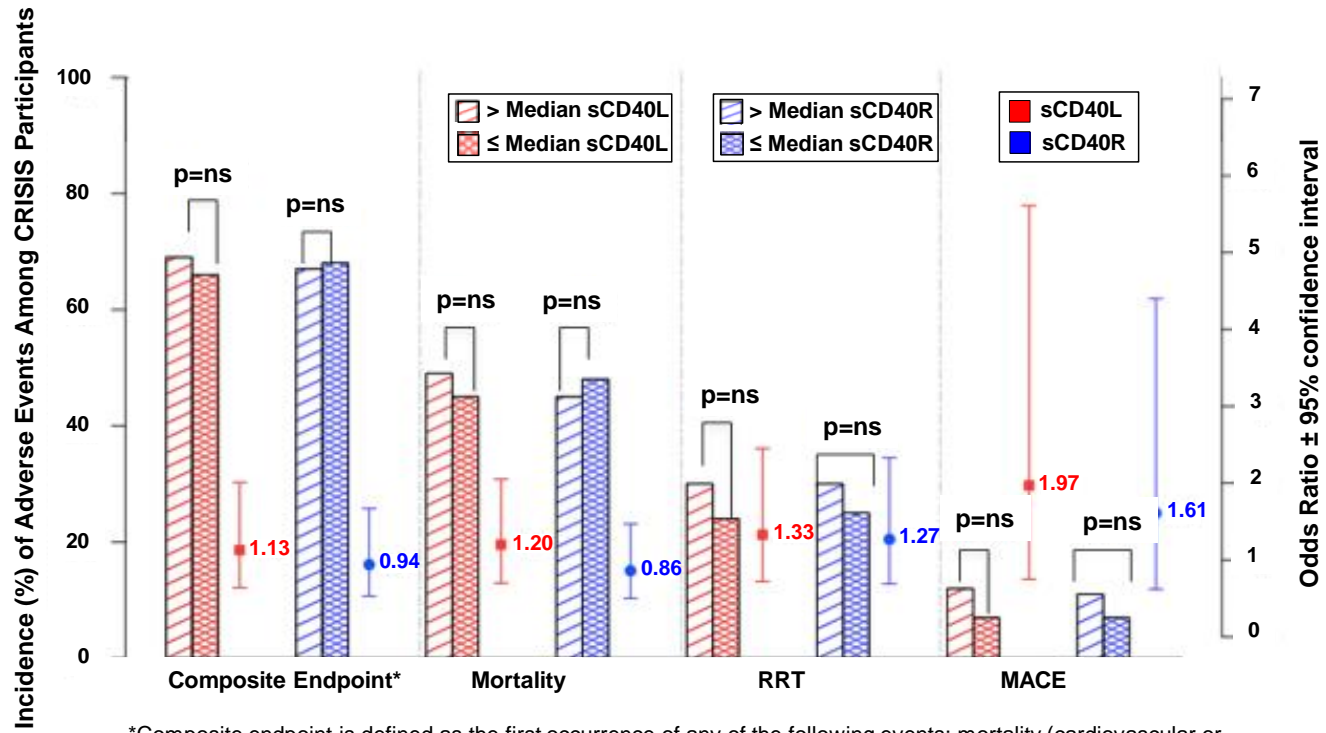

\*Composite endpoint is defined as the first occurrence of any of the following events: mortality (cardiovascular or renal death); renal replacement therapy (RRT); and major adverse cardiovascular event (MACE) comprising either myocardial infarction, congestive heart failure or stroke.

Abbreviations: sCD40L, soluble CD40 ligand; and sCD40R, soluble CD40 receptor.
